# Supplementary material for: Effects of Retinal Transcription Regulation After GB20 Needling Treatment in Retina With Optic Neuritis
Source: Front Integr Neurosci. 2020 Sep 29;14:568449. doi: 10.3389/fnint.2020.568449 (PMC7550785; doi:10.3389/fnint.2020.568449)
Supplement: TABLE S3 — Average FPKM values of DEGs of GV16 group compared with MOG group. [file Table_3.xlsx]

## Sheet: Sheet1
Supplementary Table 3	Average FPKM values of DEGs of GV16 group compared with MOG group
Gene ID	Gene_name	GV16_FPKM	MOG_FPKM	p value	Fold change
ENSMUSG00000036480	Prss56	2.34496	9.02007	1.26793e-23	0.260106
ENSMUSG00000020080	Hkdc1	1.71446	4.13994	5.2491e-15	0.414446
ENSMUSG00000030905	Crym	11.4936	19.035	8.94764e-15	0.60391
ENSMUSG00000024222	Fkbp5	5.07163	3.21372	9.09701e-08	1.5782
ENSMUSG00000024501	Dpysl3	55.619	43.1168	1.51219e-06	1.29025
ENSMUSG00000037379	Spon2	0.613236	1.92335	2.64813e-06	0.318752
ENSMUSG00000001773	Folh1	11.1239	6.26381	3.48739e-06	1.77545
ENSMUSG00000031980	Agt	2.54606	5.46148	1.45014e-05	0.466726
ENSMUSG00000006782	Cnp	4.22557	6.85021	1.8319e-05	0.617228
ENSMUSG00000055866	Per2	7.86511	5.11002	2.31484e-05	1.54087
ENSMUSG00000000957	Mmp14	2.25664	3.69595	6.60589e-05	0.61096
ENSMUSG00000031538	Plat	1.8177	3.05353	6.63237e-05	0.595698
ENSMUSG00000038526	Car14	25.3347	17.8956	0.000116296	1.41555
ENSMUSG00000021750	Fam107a	6.06514	3.53832	0.000199587	1.71402
ENSMUSG00000049313	Sorl1	7.59293	10.0038	0.000314981	0.759346
ENSMUSG00000038550	Ciart	7.31903	4.21904	0.000475626	1.73611
ENSMUSG00000037656	Slc20a2	6.47949	8.81683	0.000581891	0.735289
ENSMUSG00000074457	S100a16	13.4119	19.5977	0.000605204	0.6844
ENSMUSG00000038156	Spon1	8.91948	11.4805	0.000605204	0.777059
ENSMUSG00000024411	Aqp4	22.277	28.2239	0.000692118	0.789505
ENSMUSG00000020038	Cry1	20.5694	15.8642	0.000786123	1.29693
ENSMUSG00000062563	Cys1	5.52189	3.23404	0.00099968	1.70586
ENSMUSG00000037225	Fgf2	6.65887	9.54954	0.00099968	0.697718
ENSMUSG00000061175	Fnip2	11.4765	8.68539	0.00103538	1.32136
ENSMUSG00000032087	Dscaml1	27.2184	33.3432	0.00116122	0.81666
ENSMUSG00000041609	Bicdl1	79.6585	65.6616	0.00145042	1.21348
ENSMUSG00000066687	Zbtb16	1.5181	0.739703	0.00191902	2.04936
ENSMUSG00000086164	Gm13029	14.0187	23.7879	0.00250767	0.590052
ENSMUSG00000022272	Myo10	6.98587	9.07084	0.00314577	0.77069
ENSMUSG00000058600	Rpl30	38.4547	30.5738	0.0031604	1.25785
ENSMUSG00000090137	Uba52	14.4305	9.79603	0.00371171	1.4742
ENSMUSG00000026204	Ptprn	22.7146	28.2882	0.00375676	0.803301
ENSMUSG00000002233	Rhoc	7.19618	11.5063	0.00481498	0.625334
ENSMUSG00000034463	Scara3	7.12774	9.63784	0.00704356	0.739493
ENSMUSG00000045294	Insig1	22.7915	28.5036	0.00721325	0.80005
ENSMUSG00000054074	Skida1	36.5333	30.5092	0.00721325	1.19776
ENSMUSG00000022389	Tef	43.9573	37.2402	0.00852137	1.18079
ENSMUSG00000026885	Ttll11	10.3689	13.5343	0.00918928	0.766214
ENSMUSG00000026473	Glul	619.972	520.519	0.011291	1.19149
ENSMUSG00000027016	Zfp385b	8.93952	11.7409	0.0125884	0.761689
ENSMUSG00000032193	Ldlr	1.73221	2.45947	0.0154999	0.704974
ENSMUSG00000039145	Camk1d	44.9618	35.5288	0.0162526	1.26596
ENSMUSG00000033066	Gas7	16.1237	19.6527	0.0162526	0.82067
ENSMUSG00000031765	Mt1	46.3899	35.5887	0.0162526	1.30405
ENSMUSG00000031502	Col4a1	5.54006	7.16483	0.0162526	0.773898
ENSMUSG00000022146	Osmr	0.920861	1.45433	0.0162526	0.634116
ENSMUSG00000028943	Espn	5.93964	7.43127	0.0174758	0.799405
ENSMUSG00000059588	Calcrl	1.41345	0.757902	0.022751	1.86691
ENSMUSG00000024598	Fbn2	0.223736	0.48333	0.0297983	0.463811
ENSMUSG00000048148	Nwd1	3.61189	2.82653	0.0344464	1.27811
ENSMUSG00000025933	Tmem14a	8.23642	5.15187	0.0369668	1.59935
ENSMUSG00000085691	Gm14216	5.26024	9.72182	0.0412664	0.541564
ENSMUSG00000057863	Rpl36	240.53	191.867	0.046571	1.25362
ENSMUSG00000001864	Aif1l	2.09007	3.155	0.046571	0.66272
ENSMUSG00000048960	Prex2	3.6606	2.9776	0.046571	1.22987
ENSMUSG00000020932	Gfap	9.72024	12.9057	0.046571	0.753747
ENSMUSG00000021991	Cacna2d3	8.31384	6.79393	0.046571	1.22424
